# Supplementary material for: In Vivo Wound Healing and In Vitro Anti-Inflammatory Activity Evaluation of Phlomis russeliana Extract Gel Formulations
Source: PubMed Central journal article supplement (PMC7321211; doi:10.3390/molecules25112695), 2020-06-10

**Supplementary data:**

***In Vivo* Wound Healing and *In Vitro* Anti-inflammatory Activity**

**Evaluation of *Phlomis russeliana* Extract Gel Formulations,**

Mehmet Evren Okur <sup>1,\*</sup>, Ayşe Esra Karadağ <sup>2,3</sup>, Neslihan Üstündağ Okur <sup>4</sup>, Yağmur Özhan <sup>5</sup>, Hande Sipahi <sup>5</sup>, Şule Ayla <sup>6</sup>, Benay Daylan <sup>6</sup>, Betül Demirci <sup>7</sup> and Fatih Demirci <sup>7,8,\*</sup>

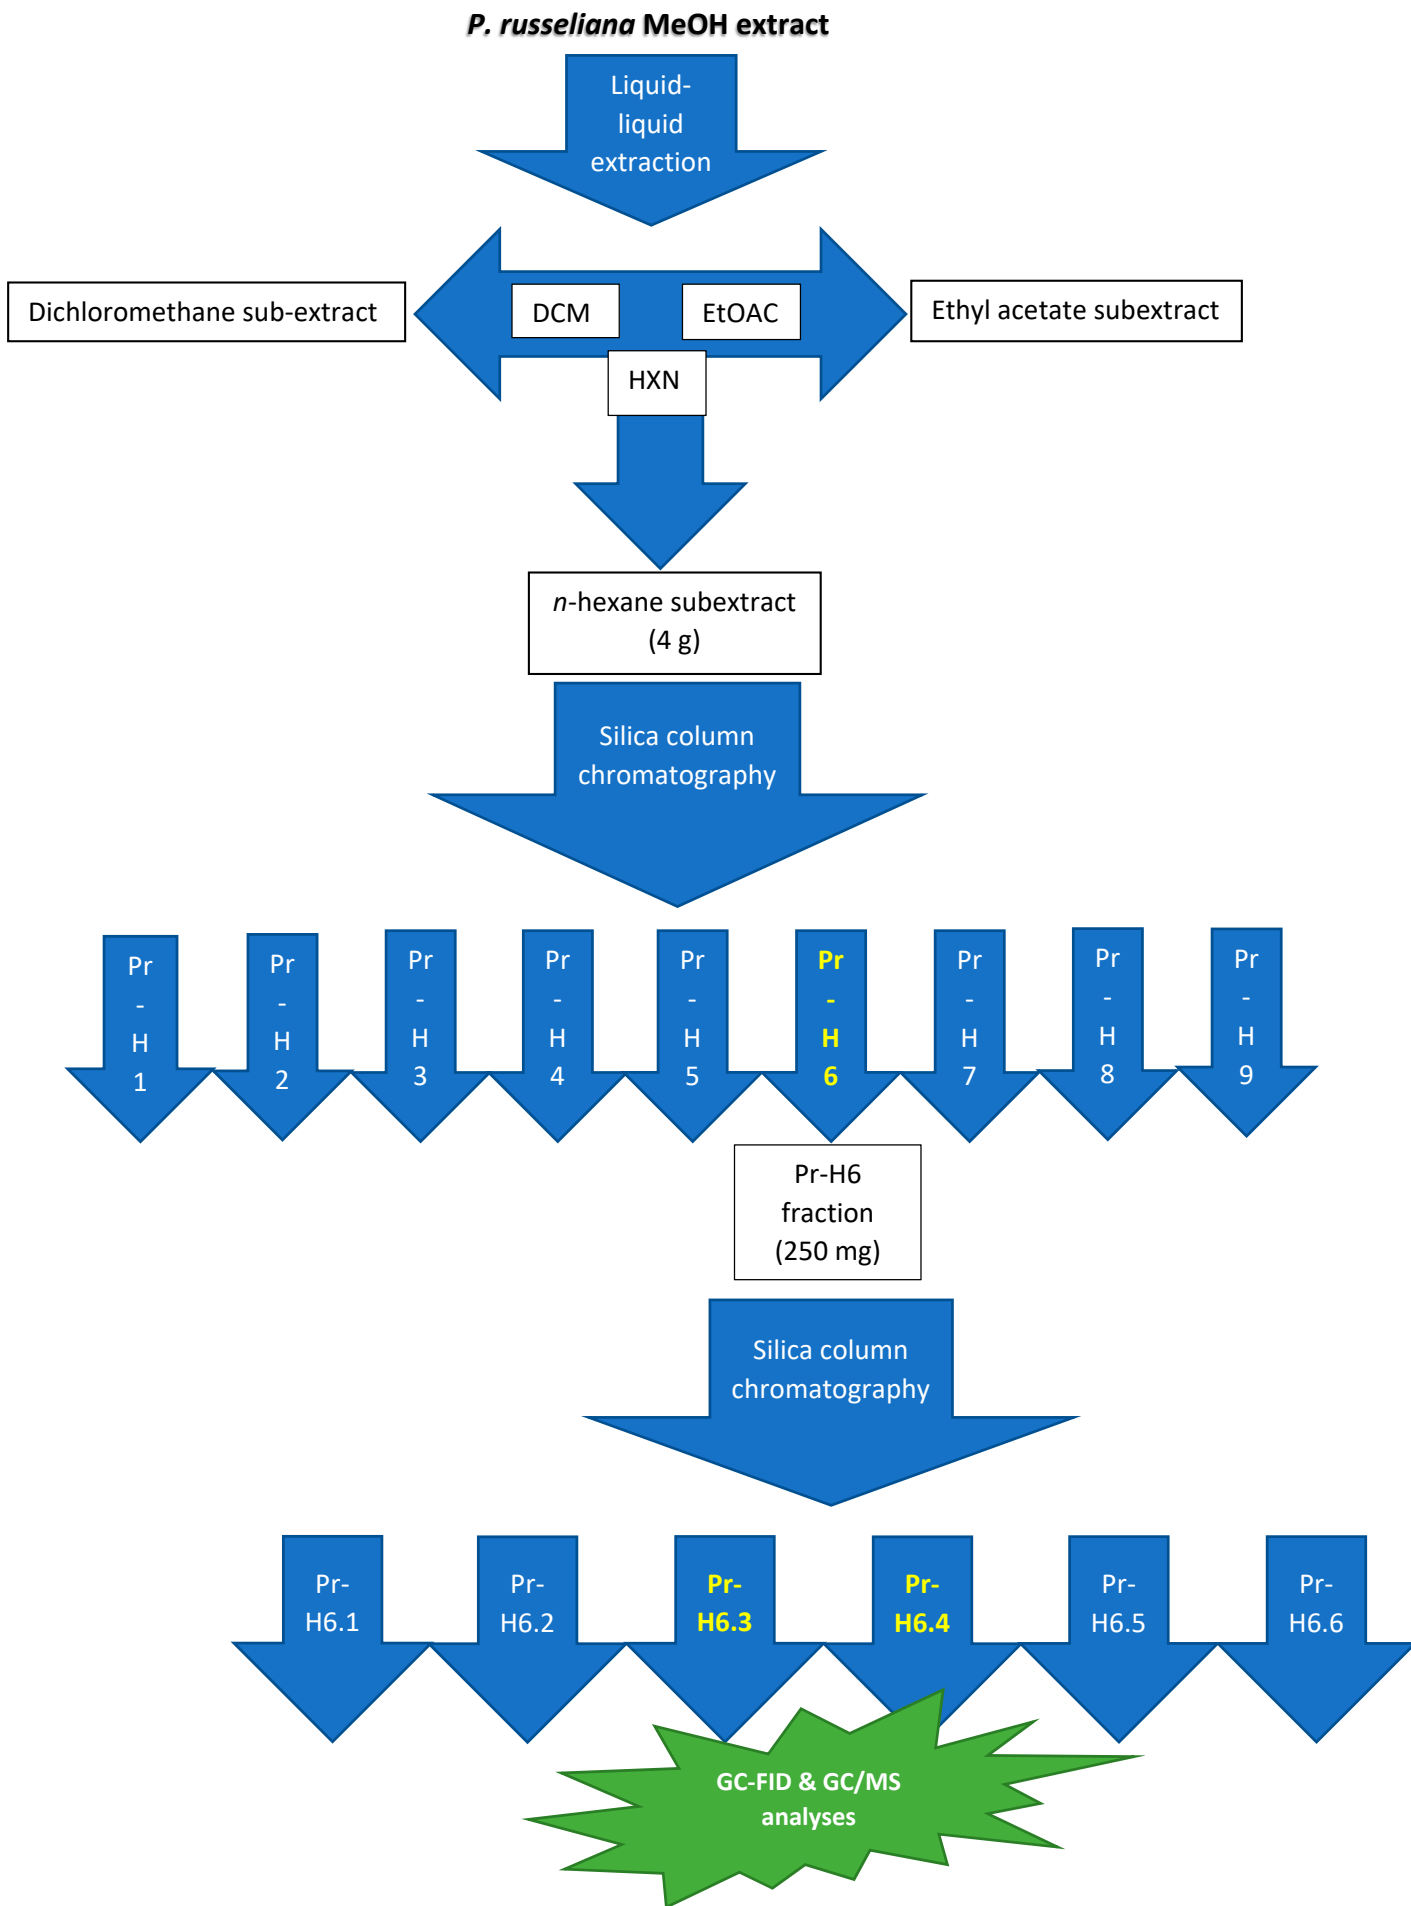

Supplement: molecules-25-02695-s001.pdf [file molecules-25-02695-s001.pdf]
